# Supplementary material for: Tedizolid-Cyclodextrin System as Delayed-Release Drug Delivery with Antibacterial Activity
Source: PubMed Central journal article supplement (PMC7795824; doi:10.3390/ijms22010115), 2020-12-24
Supplement: ijms-22-00115-s001.pdf [file ijms-22-00115-s001.pdf]

## Supplementary material

**Table S1.** Summary of results for validation parameters of the HPLC-DAD method at pH 1.2, pH 4.5 and pH 6.8

| Parameter                                           | Dissolution and permeability studies |               |               |
|-----------------------------------------------------|--------------------------------------|---------------|---------------|
|                                                     | pH 1.2                               | pH 4.5        | pH 6.8        |
| Selectivity                                         |                                      |               |               |
| Peak symmetry factor (0.8-1.5 required)             | 1.3                                  | 1.1           | 1.1           |
| Absence of interfering substances                   | confirmed                            | confirmed     | confirmed     |
| Limit of detection, LOD [mg mL <sup>-1</sup> ]      | 0.0014                               | 0.0003        | 0.0004        |
| Limit of quantification, LOQ [mg mL <sup>-1</sup> ] | 0.0042                               | 0.0011        | 0.0013        |
| Linearity $y = ax + b$                              |                                      |               |               |
| $a \pm S_a$                                         | 143.89±2.55                          | 58.76±3.06    | 60.78±1.39    |
| $b \pm S_b$                                         | insignificant                        | insignificant | insignificant |
| Correlation coefficient ( $r$ )                     | 0.9998                               | 0.9981        | 0.9997        |
| Range of linearity [mg mL <sup>-1</sup> ]           | 0.006 – 0.068                        | 0.001 – 0.006 | 0.002 – 0.021 |
| Accuracy                                            |                                      |               |               |
| Recovery (95-105% requires) [%]                     | 101.4                                | 97.6          | 97.5          |
| Precision                                           |                                      |               |               |
| Concentration [mg mL <sup>-1</sup> ]                | 0.0680                               | 0.0060        | 0.0210        |
| Average of 6 injections [mg mL <sup>-1</sup> ]      | 0.0689                               | 0.0059        | 0.0205        |
| SD                                                  | 0.0017                               | 0.0002        | 0.0003        |
| RSD (<5% required) [%]                              | 2.47                                 | 3.39          | 1.46          |

where  $S_D$  is the average of standard deviations of determinations in the lower range of linearity and  $a$  is the directional coefficient of the plotted linear function;  $S_a$  standard deviation of slope;  $S_b$  standard deviation of intercept,  $t$ , calculated values of Student's t-test,  $t_{\alpha,t} = 2.228$  critical values of Student's test for degrees of freedom  $f = 10$  and significance level  $\alpha = 0.05$ .
